# Supplementary material
Source: PubMed Central journal article supplement (PMC4457478)
Supplement: mmc1.pdf [file mmc1.pdf]

# DISTINCT FUNCTIONAL ROLES OF CARDIAC MITOCHONDRIAL SUBPOPULATIONS REVEALED BY 3D SIMULATION MODEL

Asuka Hatano<sup>\*1</sup>, Jun-ichi Okada<sup>2</sup>, Takumi Washio<sup>2</sup>, Toshiaki Hisada<sup>2</sup>, Seiryu Sugiura<sup>2</sup>

<sup>1</sup>Department of Mechanical Engineering, <sup>2</sup>Department of Frontier Science,  
University of Tokyo, Japan

**\*Correspondence:** Asuka Hatano, Department of Mechanical Engineering, Graduate School of Engineering, The University of Tokyo, 7-3-1 Hongo, Bunkyo-ku, Tokyo 113-8656, Japan.

E-mail: [hatano@fml.t.u-tokyo.ac.jp](mailto:hatano@fml.t.u-tokyo.ac.jp)

## SUPPORTING MATERIAL

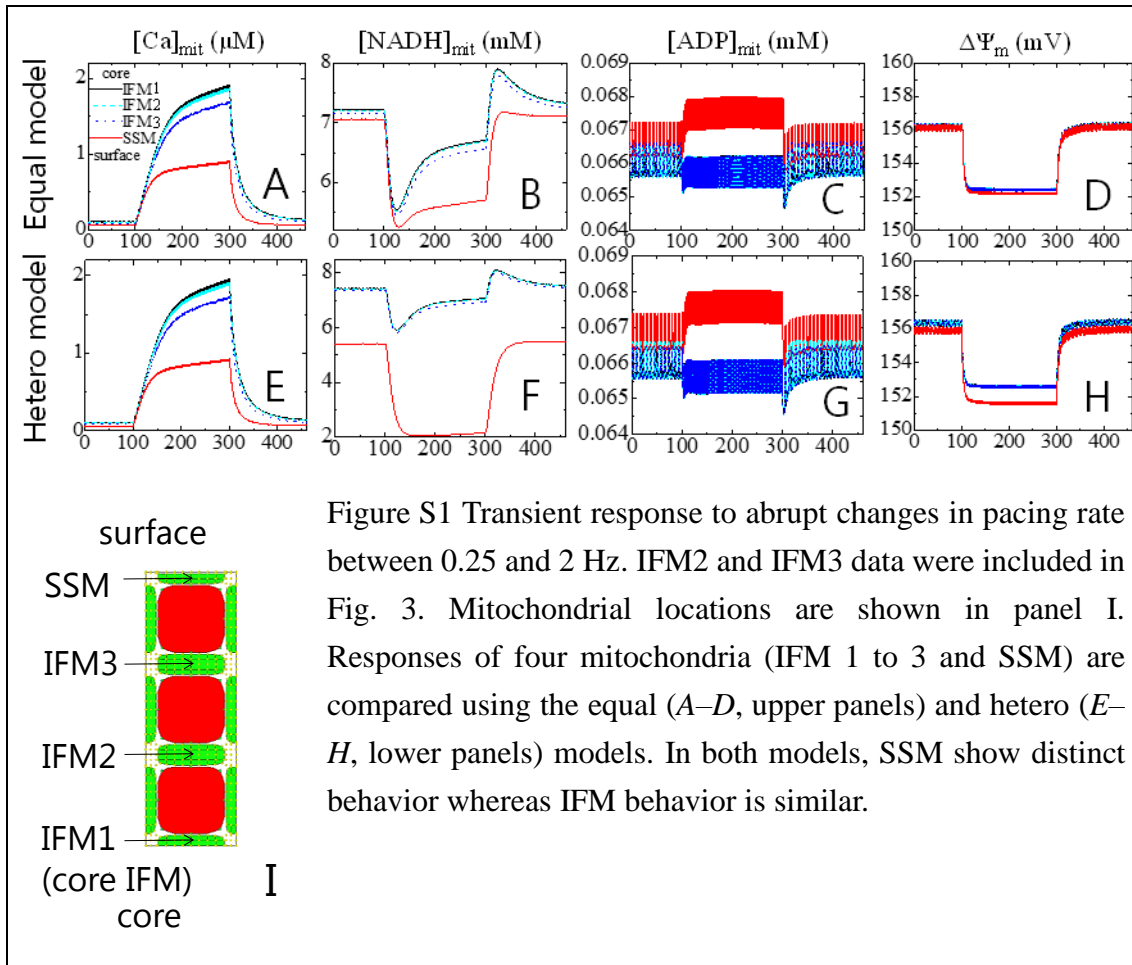

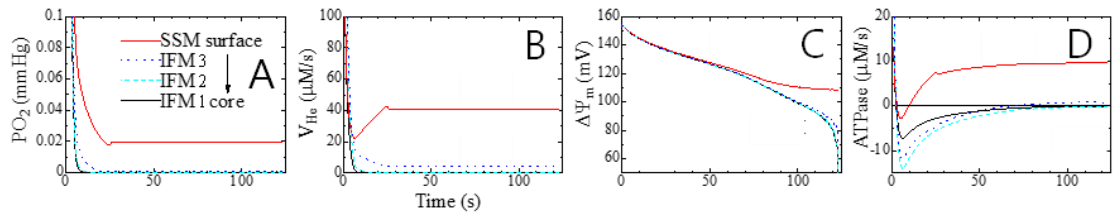

Figure S2 Response to step decreases in extracellular  $PO_2$  from 40 to 1 mmHg. IFM2 and IFM3 data were included in the upper panels of Fig. 4. Mitochondrial locations are indicated in panel I of Fig. S1. Responses of four mitochondria (IFM 1 to 3 and SSM) are compared. (A) local  $PO_2$ ; (B) proton pump activity; (C) mitochondrial inner membrane potential; and (D) mitochondrial ATPase activity. Under hypoxic conditions, SSM show distinct behavior whereas IFM behavior gradually changes from the surface to the core.
